# Supplementary material for: Designing of dual inhibitors for GSK-3β and CDK5: Virtual screening and in vitro biological activities study
Source: PubMed Central journal article supplement (PMC5392312; doi:10.18632/oncotarget.15085), 2017-02-04
Supplement: oncotarget-08-18118-s001.pdf [file oncotarget-08-18118-s001.pdf]

## Designing of dual inhibitors for GSK-3 $\beta$ and CDK5: Virtual screening and *in vitro* biological activities study

### SUPPLEMENTARY FIGURES AND TABLE

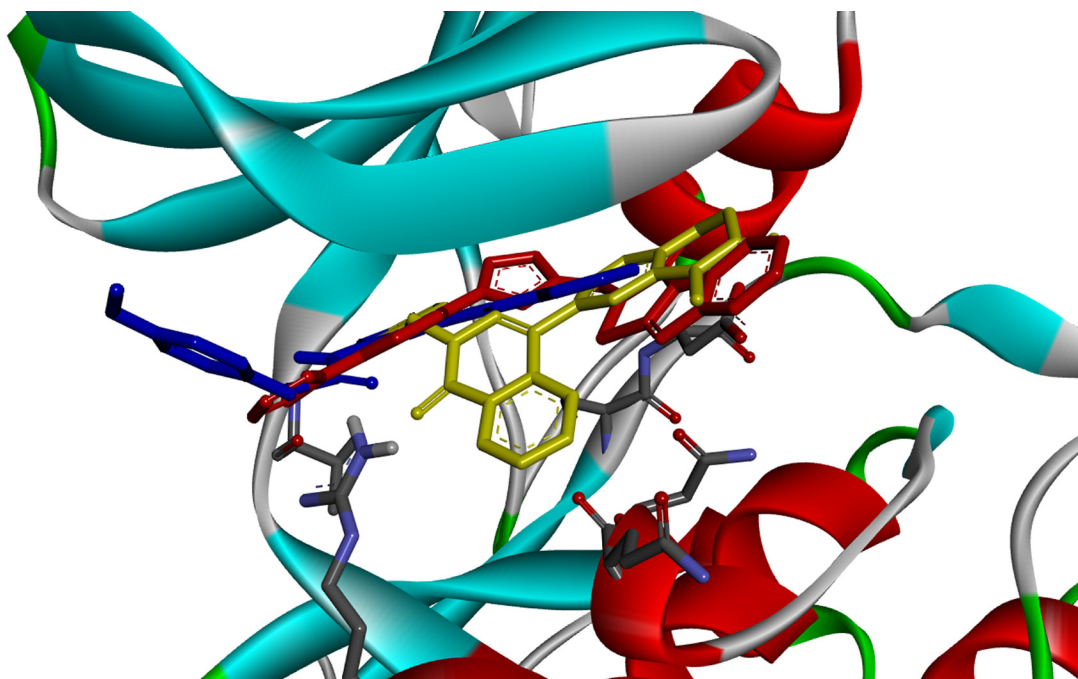

Supplementary Figure 1: The binding conformations of Compound 6, Compound 8 and Compound 9 for GSK-3 $\beta$ .

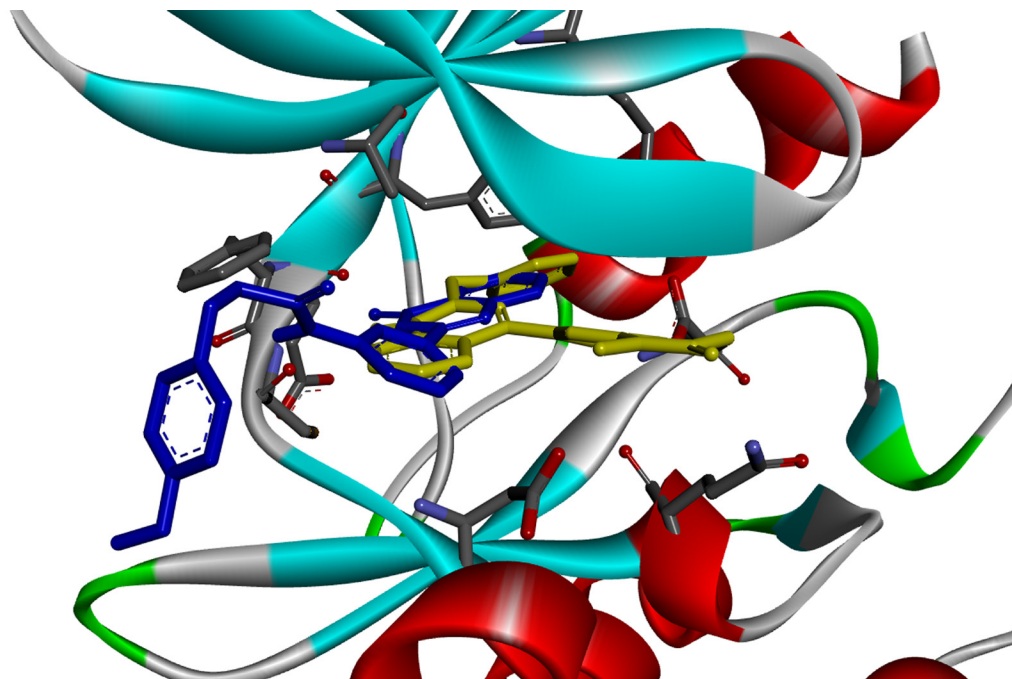

Supplementary Figure 2: The binding conformations of Compound 8 and Compound 9 for CDK5.

**Supplementary Table 1: Docking energies of 127 compounds**

See Supplementary File 1
